# Supplementary material for: The microstructure and melt properties of CO–ethylene copolymers with remarkably low CO content
Source: Royal Society of Chemistry journal article supplement (doi:10.1039/c3py01637d), 2014-01-01
Supplement: c3py01637d1.pdf [file c3py01637d1.pdf]

ARTICLE

## Microstructure and Melt Properties of CO-Ethylene Copolymers with Remarkably Low CO-Content

Cite this: DOI: 10.1039/x0xx00000x

Saeeda S. Soomro,<sup>a</sup> Daniela Cozzula,<sup>a</sup> Walter Leitner,<sup>b</sup> Henning Vogt<sup>a</sup> and Thomas E. Müller<sup>a\*</sup>

Received 00th January 2012,  
Accepted 00th January 2012

DOI: 10.1039/x0xx00000x

[www.rsc.org/](http://www.rsc.org/)

## ARTICLE

## Supplementary information

## Materials

Palladium acetate (99 %) and deuterated chlorobenzene (99 %) were obtained from Sigma-Aldrich. The parent protonated phosphine sulphonato ligand **HL** was purchased from Convertex®. Ethylene (3.0) was obtained from Gerling Holz & Co. Hamburg; carbon monoxide (3.7) was acquired from Praxair, Belgium. Dichloromethane was distilled over CaH<sub>2</sub> and degassed by the freeze-pump-thaw technique.

## Synthesis of polyketones

Reaction conditions for the synthesis of polyketones **P1** to **P11** by copolymerization of carbon monoxide and ethylene are summarised in Table S1.

**Table S1.** Reaction conditions and yield in the Pd-catalysed copolymerization of CO and ethylene to polyketones **P1** to **P11** and reference samples **R1** and **R2**.

| Polyketone | c(Pd) <sup>a</sup><br>[10 <sup>-3</sup> mol l <sup>-1</sup> ] | Ratio<br>CO/C <sub>2</sub> H <sub>4</sub> | T<br>[°C] | Time<br>[h] | TOF<br>[g (mmol <sub>Pd</sub> h) <sup>-1</sup> ] | Yield<br>[g] |
|------------|---------------------------------------------------------------|-------------------------------------------|-----------|-------------|--------------------------------------------------|--------------|
| <b>R1</b>  | 0.1 <sup>b</sup>                                              | 20/20                                     | 115       | 17          | -                                                | 2.2          |
| <b>P1</b>  | 0.05                                                          | 15/35                                     | 110       | 18          | 17                                               | 15           |
| <b>P2</b>  | 0.05                                                          | 12/38                                     | 110       | 18          | 13                                               | 12           |
| <b>P3*</b> | 0.05                                                          | 6/44                                      | 110       | 17          | 11                                               | 9.2          |
| <b>P4</b>  | 0.05                                                          | 1/49                                      | 110       | 2.5         | 96                                               | 12           |
| <b>P5</b>  | 0.05                                                          | 1/49                                      | 110       | 6.5         | 102                                              | 33           |
| <b>P6</b>  | 0.037                                                         | 1/49                                      | 110       | 2.0         | 75                                               | 5.6          |
| <b>P7</b>  | 0.025                                                         | 1/49                                      | 110       | 2.5         | 53                                               | 3.3          |
| <b>P8</b>  | 0.01                                                          | 1/49                                      | 110       | 60          | 10                                               | 0.6          |
| <b>P9</b>  | 0.05                                                          | 1/49                                      | 100       | 3.0         | 66                                               | 9.9          |
| <b>P10</b> | 0.05                                                          | 1/49                                      | 120       | 2.5         | 76                                               | 9.5          |
| <b>P11</b> | 0.05                                                          | 1/49                                      | 130       | 2.0         | 100                                              | 10           |
| <b>R2</b>  | 0.02                                                          | 1/49                                      | 110       | 1.0         | -                                                | 15           |
| <b>PE</b>  | 0.015                                                         | 0/50                                      | 110       | 1.6         | -                                                | 4.2          |

<sup>a</sup> Ratio Pd(OAc)<sub>2</sub>/HL 1/1.5; <sup>b</sup> Ligand **HL** replaced with DPPPr = bis-diphenylphosphinopropane.

More detailed investigation of the gas uptake with time during the preparation of the polyketones **P1-P11** showed that the reaction proceeded in three distinct phases. After an induction period (*t*<sub>ind</sub>) of 10 min where hardly any gas consumption occurred, gas uptake commenced slowly for about 40 min (initiation period *t*<sub>ini</sub>, **P4**: 11×10<sup>-3</sup> g<sub>CO</sub>/C<sub>2</sub>H<sub>4</sub>/min). Thereafter, the reaction accelerated, and the gas uptake became faster (**P4**: 107×10<sup>-3</sup> g<sub>CO</sub>/C<sub>2</sub>H<sub>4</sub>/min). The rate of the gas uptake was approximately constant for the remaining reaction time.

## Methods used for characterization of the polyketones

<sup>1</sup>H and <sup>13</sup>C{<sup>1</sup>H} NMR spectra were measured on a Bruker, AV III 300 NMR spectrometer in deuterated chlorobenzene at 95 °C (**P2-P11**, **R2**) or 1,1,1,3,3,3-hexafluoroisopropanol (HFIP)/C<sub>6</sub>D<sub>6</sub> at room temperature (**P1**, **R1**). The CO content was determined from the <sup>1</sup>H NMR spectra as described in the literature.<sup>1</sup>

The molecular weight distribution was determined by high-temperature GPC analysis. The analyses were performed at 150 °C on a PSS Polefin 10 μm, 1000 Å, ID 8.0 mm x 300 mm column against polystyrene as standard. The eluting solvent was 1,2,4-trichlorobenzene (flow rate 1.0 mL/min).

The phase behaviour was characterized on a Perkin-Elmer Pyris 6 differential scanning calorimeter. A sample of the polymer (*ca.* 10 mg, **R1**, **P4-P11**, **R2**, **PE**) was placed into the sample holder. The latter was placed into a flow of argon, and the temperature was adjusted to 25 °C. Then, the sample was heated at 10 °C min<sup>-1</sup> to a temperature at least 50 °C below *T*<sub>d</sub>, cooled to 25 °C (10 °C min<sup>-1</sup>) and held there for 2 min. The heating and cooling cycle was repeated. For the polymers **P2** and **P3**, the temperature was adjusted initially to -50 °C. Then, the sample was heated to 220 °C at 10 °C min<sup>-1</sup>, cooled to -50 °C (10 °C min<sup>-1</sup>) and held there for 5 min. The heating and cooling cycle was repeated. The melting point and the solidification temperature are given as the minimum/maximum of the heat flow curve in the second heating/cooling cycle.

The crystallinity of polymer samples was calculated by Equation 1a-c, whereby *H'* is the heat given off by that part of the polymer which was crystalline before heating, *H*<sub>m</sub> the heat of melting, *H*<sub>c</sub> the heat of cooling, *H*<sub>m</sub><sup>\*</sup> the specific heat of melting, *m*<sub>c</sub> the amount of polymer that was crystalline, *m* the weight of the sample, *χ* the crystallinity in percent.

$$H' = H_m - H_c$$

$$m_c = \frac{H'}{H_m^*}$$

$$\chi = \frac{m_c}{m} \times 100\%$$

**Equation 1a-c.** Calculation of the crystallinity from the difference between the heat of melting and the heat of solidification.

The melting points were confirmed by heating a sample of the polymer (*ca.* 2 mg) on a melting point meter (Schorpp Gerätetechnik MPM-HV2) following the transparency of the sample.

The viscosity of the polymers (**P4-P11**, **R2**) was determined on a Physica MCR 501 Rheometer from Anton Paar using a cone-plate geometry (measuring system DCP35). The sample (0.1 g) was applied to the rheometer plate, heated to 160 °C and subjected to a shear rate increasing from 0.01 to 1000 s<sup>-1</sup> within 10 min. The viscosity is given as the average viscosity in the range of 200 to 770 s<sup>-1</sup>. Samples **R1**, **P1**, **P2**, **P3** and **PE** did not melt.

Thermogravimetric analysis (TGA) traces were recorded on a Mettler Toledo Gas Controller GC20 with STRe System. A sample of the polymer (*ca.* 20 mg) was placed into a flow of argon and the temperature adjusted to 25 °C. The sample was then heated to 600 °C at 10 °C min<sup>-1</sup> and the weight loss recorded.

Powder XRD patterns were collected on a Stoe STADI P powder diffractometer (STOE & Cie KG, Darmstadt; transmission mode) equipped with a Johann Germanium monochromator (Cu-K $\alpha$ 1 radiation) and an image plate detector. A sample of the polymer was placed on a flat sample holder and the XRD pattern recorded in the range of  $0^\circ \leq 2\theta \leq 130^\circ$  in  $0.015^\circ$  steps. The program WinXPOW was used to fit the profiles.

### Characterization of polyketones

The IR spectra of polyketones **P1** – **P11** in comparison to the spectra of reference samples **R1**, **R2** and **PE** are shown in Figure S1.

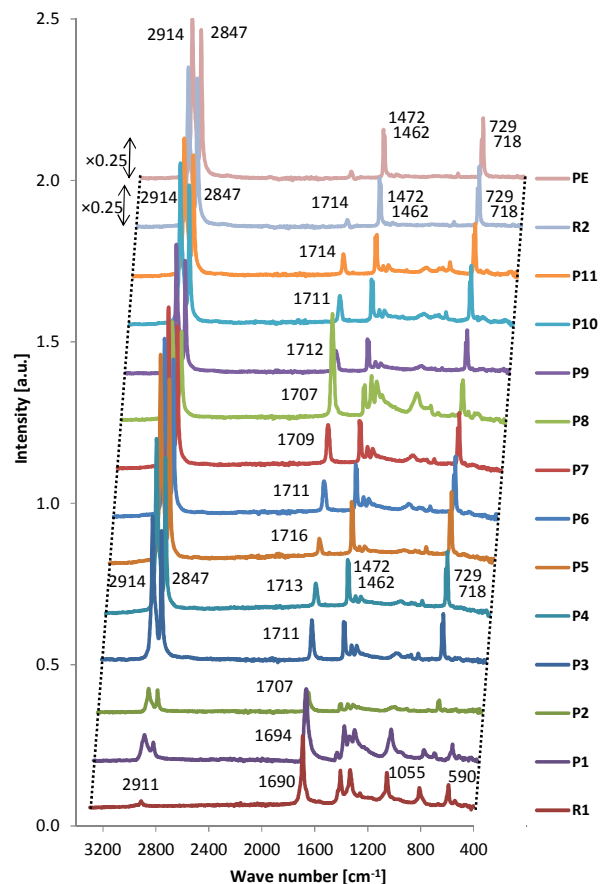

**Figure S1.** IR spectra of polyketones **P1** – **P11** compared to those of polyketone **R1** with alternating CO–C<sub>2</sub>H<sub>4</sub> segments, reference material **R2** with very low CO content and polyethylene **PE**.

The contribution of moieties  $\alpha$ ,  $\beta$  and  $\gamma$  to the CO stretch vibration in the IR spectra of polyketones **P1** – **P11** and reference samples **R1**, **R2** and **PE** was analysed by deconvolution of the signal in the range of  $1800 - 1600 \text{ cm}^{-1}$  based on the assumption that the extinction coefficient of the carbonyl band in each moiety is equal (Figure S2 - Figure S14).

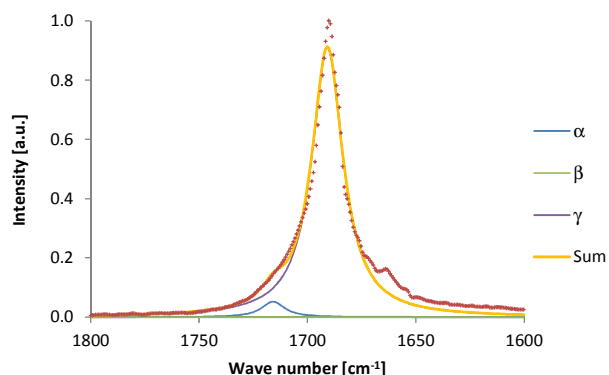

**Figure S2.** Deconvolution of the CO stretch vibration in the IR spectrum of **R1**.

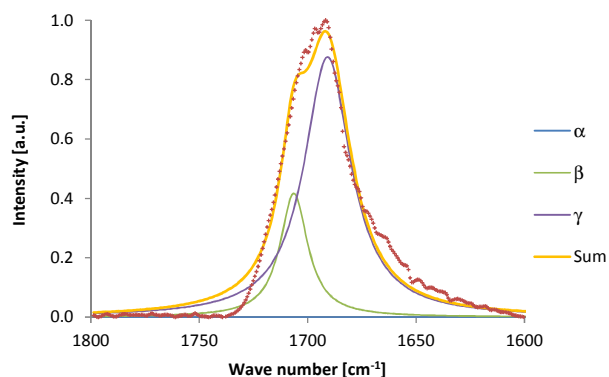

**Figure S3.** Deconvolution of the CO stretch vibration in the IR spectrum of **P1**.

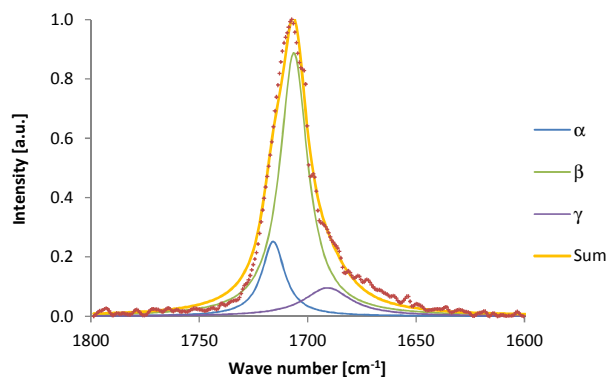

**Figure S4.** Deconvolution of the CO stretch vibration in the IR spectrum of **P2**.

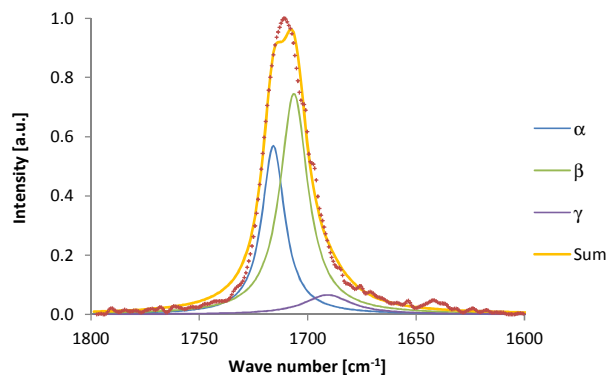

**Figure S5.** Deconvolution of the CO stretch vibration in the IR spectrum of **P3**.

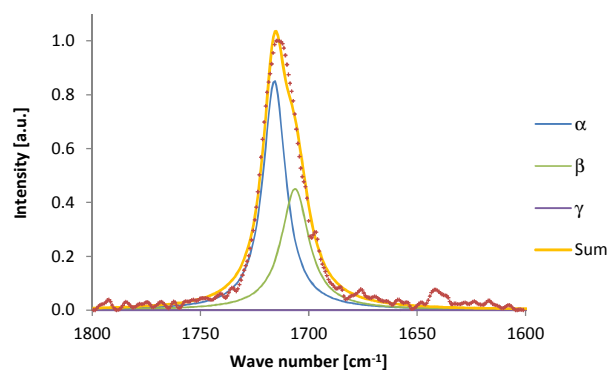

Figure S6. Deconvolution of the CO stretch vibration in the IR spectrum of P4.

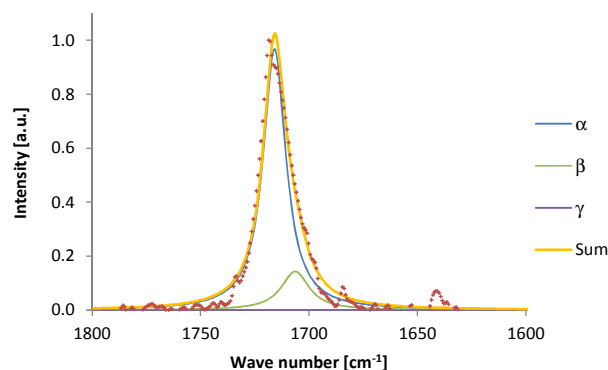

Figure S7. Deconvolution of the CO stretch vibration in the IR spectrum of P5.

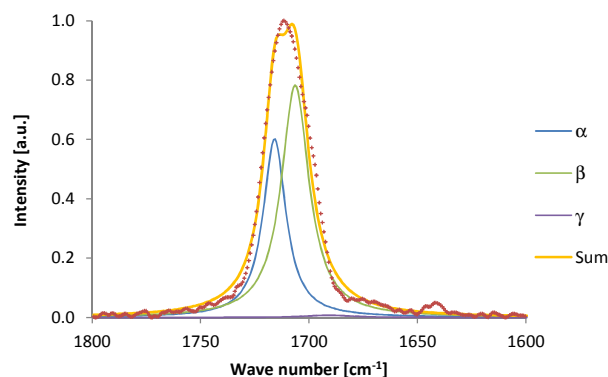

Figure S8. Deconvolution of the CO stretch vibration in the IR spectrum of P6.

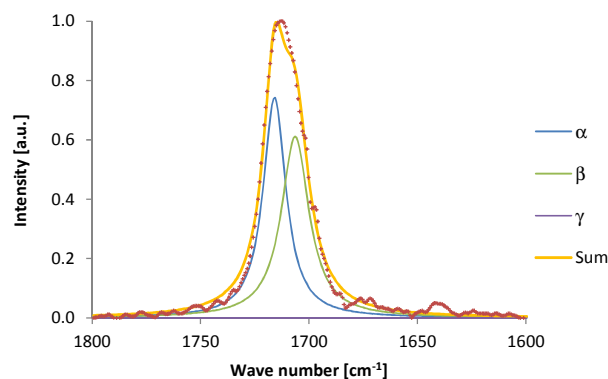

Figure S9. Deconvolution of the CO stretch vibration in the IR spectrum of P7.

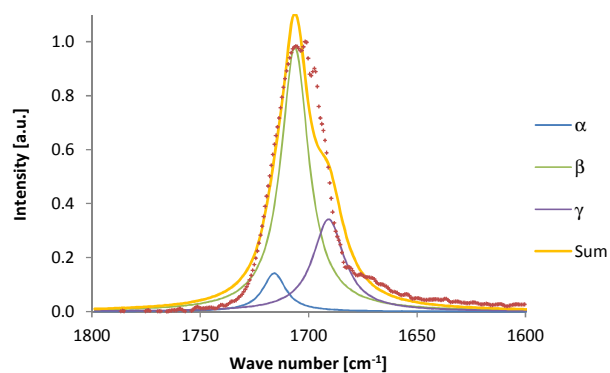

Figure S10. Deconvolution of the CO stretch vibration in the IR spectrum of P8. Note that the position  $\nu_i$  of the contributions of moieties  $\alpha$ ,  $\beta$  and  $\gamma$  were refined to a common position for polyketones P1 – P11 and reference samples R1 and R2 giving rise to the less accurate fit in the case of polyketone P8.

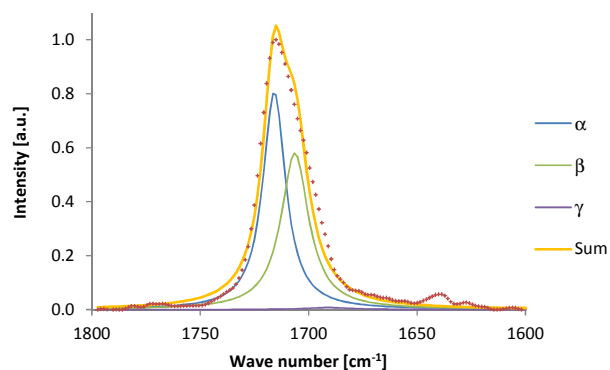

Figure S11. Deconvolution of the CO stretch vibration in the IR spectrum of P9.

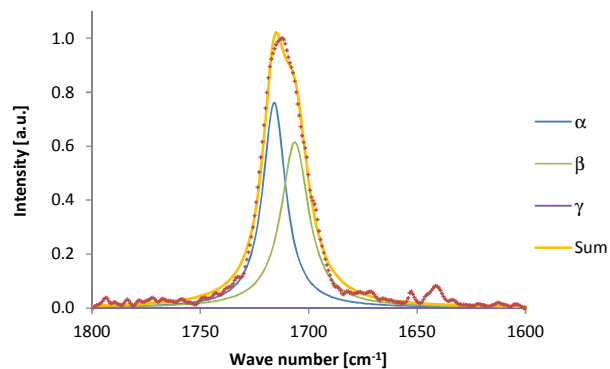

Figure S12. Deconvolution of the CO stretch vibration in the IR spectrum of P10.

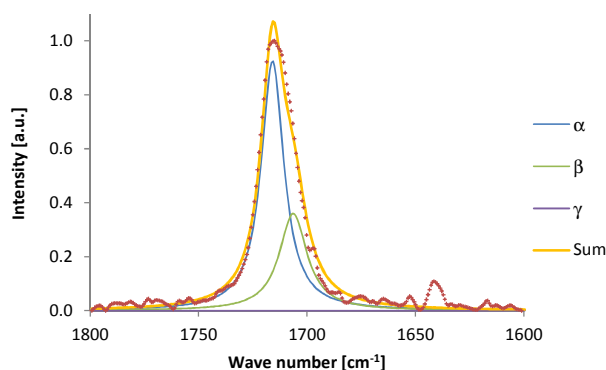

Figure S13. Deconvolution of the CO stretch vibration in the IR spectrum of P11.

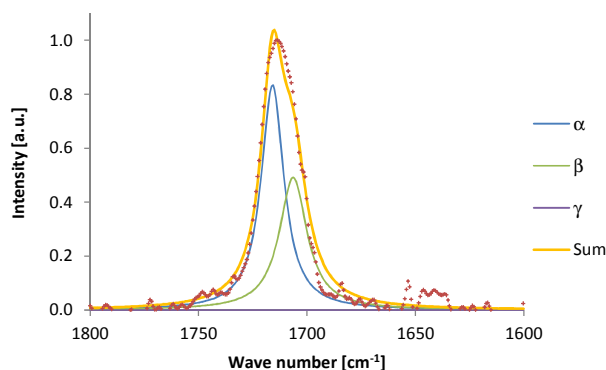

Figure S14. Deconvolution of the CO stretch vibration in the IR spectrum of R2.

The contribution of moieties  $\alpha$ ,  $\beta$  and  $\gamma$  to the CO stretch vibration in the IR spectra of polyketones P1 – P11 and reference samples R1, R2 and PE was obtained by deconvolution of the signal in the range of 1800 – 1600  $\text{cm}^{-1}$  (Table S2).

Table S2. Position of the CO stretch vibration and relative intensity of moieties  $\alpha$ ,  $\beta$  and  $\gamma$  in polyketones P1 to P11 in comparison to reference samples R1 and R2.

| Polyketone | CO content [wt%] | $\nu_{\text{C=O}}$ <sup>a</sup> [ $\text{cm}^{-1}$ ] | Moiety   |         |          |
|------------|------------------|------------------------------------------------------|----------|---------|----------|
|            |                  |                                                      | $\alpha$ | $\beta$ | $\gamma$ |
| R1         | 50.0             | 1690                                                 | 0.04     | 0.00    | 0.96     |
| P1         | 28.9             | 1694                                                 | 0.00     | 0.22    | 0.78     |
| P2         | 16.1             | 1707                                                 | 0.16     | 0.71    | 0.13     |
| P3*        | 3.7              | 1712                                                 | 0.35     | 0.56    | 0.08     |
| P4         | 2.5              | 1713                                                 | 0.61     | 0.39    | 0.00     |
| P5         | 1.5              | 1716                                                 | 0.85     | 0.15    | 0.00     |
| P6         | 2.4              | 1710                                                 | 0.38     | 0.61    | 0.01     |
| P7         | 5.5              | 1709                                                 | 0.50     | 0.50    | 0.00     |
| P8         | 13.5             | 1707 <sup>b</sup>                                    | 0.08     | 0.66    | 0.26     |
| P9         | 2.4              | 1712                                                 | 0.53     | 0.46    | 0.01     |
| P10        | 3.0              | 1711                                                 | 0.50     | 0.50    | 0.00     |
| P11        | 2.4              | 1714                                                 | 0.68     | 0.32    | 0.00     |
| R2         | 0.7              | 1714                                                 | 0.58     | 0.42    | 0.00     |

<sup>a</sup> Maximum of the  $\nu_{\text{C=O}}$  vibration; <sup>b</sup> Three distinct maxima at 1713, 1702 and 1693  $\text{cm}^{-1}$ .

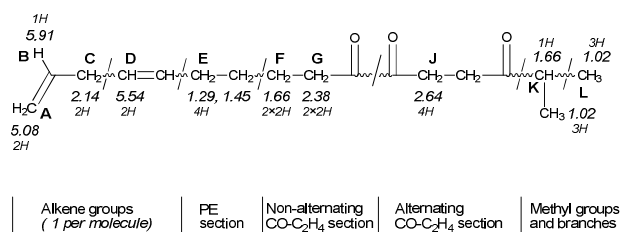

Scheme S1. Assignment of the signals in the  $^1\text{H}$  NMR spectrum of polyketone P4.

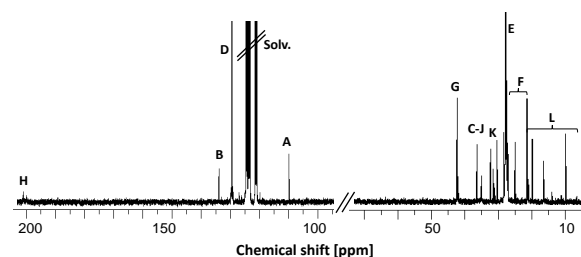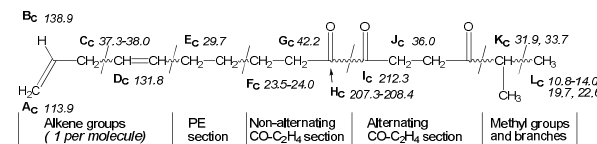

Figure S15. Selected range of the  $^{13}\text{C}\{^1\text{H}\}$  NMR spectrum of P2 (top) and assignment of the signals (bottom).

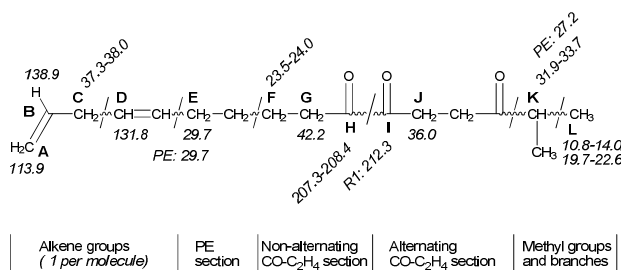

Scheme S2. Range for the signals observed in the  $^{13}\text{C}\{^1\text{H}\}$  NMR spectra of polyketones P1-P11.

The molecular features of the polyketones were quantified by analysis of the integrals of the  $^1\text{H}$  NMR spectra according to Equation S2 to Equation S5.

$$M_n = \frac{(A + B + C + D + E + F + 2G + 2J + K + L) \times \frac{28}{4}}{\frac{D}{2} + \frac{A+B}{3}}$$

Equation S2. Calculation of the molecular weight based on the integrals of the signals in the  $^1\text{H}$  NMR spectra.

$$\frac{n_b}{n_{\text{C}_2\text{H}_4}} = \frac{\frac{L}{3} - \frac{A+B}{3} - \frac{D}{2}}{A + B + C + D + E + F + G + J + K + L}$$

Equation S3. Calculation of the average number of branches  $n_b$  per ethylene unit based on the integrals of the signals in the  $^1\text{H}$  NMR spectra.

$$n_l = \frac{(A + B + C + D + E + F + G + K + L) \times 2}{G}$$

**Equation S4.** Calculation of the average length  $n_l$  of the oligomeric  $-(C_2H_4)_n-$  segments between two neighbouring CO groups in non-alternating segments based on the integrals of the signals in the  $^1H$  NMR spectra.

$$n_{CH_2 alt} = \frac{F}{(A + B + C + D + E + F + G + J + K + L)}$$

**Equation S5.** Calculation of  $CH_2$  groups neighbouring isolated and non-alternating  $CO-C_2H_4$  ( $\alpha+\beta$  moieties) based on the integrals of the signals in the  $^1H$  NMR spectra.

The structural data of the polyketones are summarised in Table S3.

**Table S3.** Structural data for polyketones **P1** to **P11**.

| Polyketone | CO content [wt%] | Isolated CO groups [wt%] | PE content [wt%] | Segment length <sup>a</sup> [units] | No. of branches [%] <sup>b</sup> |
|------------|------------------|--------------------------|------------------|-------------------------------------|----------------------------------|
| <b>P1</b>  | 28.9             | 13.9                     | 42.2             | 8.1                                 | 1.54                             |
| <b>P2</b>  | 16.1             | 12.3                     | 67.7             | 13.0                                | 0.24                             |
| <b>P3</b>  | 3.7              | 2.9                      | 92.6             | 66.2                                | 0.59                             |
| <b>P4</b>  | 2.5              | 1.8                      | 95.1             | 107.2                               | 0.20                             |
| <b>P5</b>  | 1.5              | 1.2                      | 97.0             | 159.3                               | 0.17                             |
| <b>P6</b>  | 2.4              | 1.8                      | 95.2             | 105.1                               | 0.28                             |
| <b>P7</b>  | 5.5              | 3.4                      | 88.9             | 54.6                                | 0.27                             |
| <b>P8</b>  | 13.5             | 9.7                      | 73.1             | 17.1                                | 0.06                             |
| <b>P9</b>  | 2.4              | 1.8                      | 95.3             | 105.0                               | 0.18                             |
| <b>P10</b> | 3.0              | 2.1                      | 94.0             | 91.6                                | 0.25                             |
| <b>P11</b> | 2.4              | 1.9                      | 95.2             | 103.8                               | 0.41                             |

<sup>a</sup> Average segment length between two neighbouring CO groups in moieties  $\gamma$ ; <sup>b</sup> Average number of methyl groups per ethylene unit.

The molecular weight of the polyketones was calculated from an end group analysis based on the  $^1H$  NMR data (Table S4)

**Table S4.** Position of the CO stretch vibration and relative intensity of moieties  $\alpha$ ,  $\beta$  and  $\gamma$  in polyketones **P1** to **P11** in comparison to reference samples **R1** and **R2**.

| Polyketone | CO content [wt%] | $M_n$ [g mol <sup>-1</sup> ] <sup>a</sup> | PDI [-] <sup>b</sup> |
|------------|------------------|-------------------------------------------|----------------------|
| <b>R1</b>  | 50.0             | -                                         | -                    |
| <b>P1</b>  | 28.9             | -                                         | -                    |
| <b>P2</b>  | 16.1             | 3077                                      | 2.3                  |
| <b>P3*</b> | 3.7              | 2843                                      | 1.9                  |
| <b>P4</b>  | 2.5              | 5272                                      | 1.7                  |
| <b>P5</b>  | 1.5              | 3919                                      | 2.1                  |
| <b>P6</b>  | 2.4              | 5413                                      | 1.8                  |
| <b>P7</b>  | 5.5              | 5827                                      | 1.7                  |
| <b>P8</b>  | 13.5             | 5408                                      | 2.0                  |
| <b>P9</b>  | 2.4              | 5610                                      | 2.1                  |
| <b>P10</b> | 3.0              | 3580                                      | 2.2                  |
| <b>P11</b> | 2.4              | 2539                                      | 2.1                  |
| <b>R2</b>  | 0.7              | 5811                                      | -                    |

<sup>a</sup> Determined by  $^1H$  NMR spectroscopy, soluble fraction; <sup>b</sup> Determined by GPC chromatography.

By using gel permeation chromatography, the polydispersity of polyketones **P2-P11** in dependence of the reaction conditions, *i.e.*, the  $CO/C_2H_4$  ratio employed (Figure S16), the amount of  $CO/C_2H_4$  gas mixture consumed (Figure S17), the catalyst loading (Figure S18) and the reaction temperature (Figure S19) was determined (Table S4). Note that the molecular weight in

gel permeation chromatography was referenced to polystyrene standard.

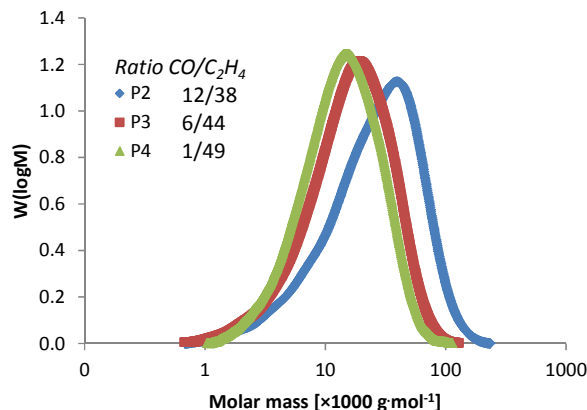

**Figure S16.** Overlay of the GPC curves of non-alternating polyketones which were obtained by varying the  $CO/C_2H_4$  ratio (**P1-P4**).

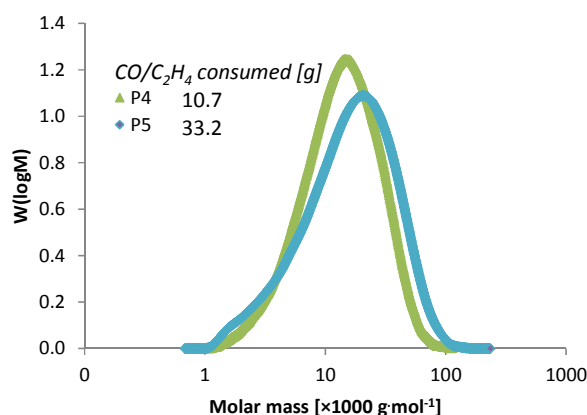

**Figure S17.** Overlay of the GPC curves of non-alternating polyketones which were obtained after a different amount of  $CO/C_2H_4$  gas mixture had been consumed (**P4-P5**).

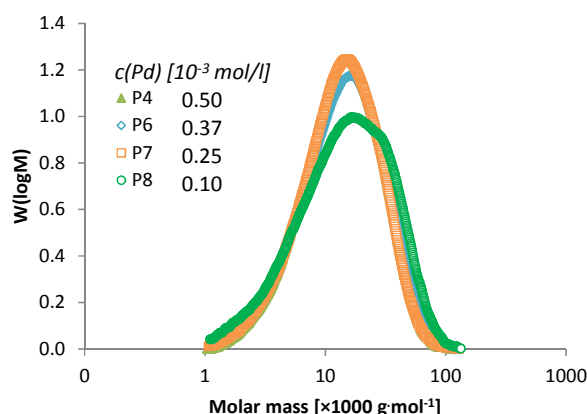

**Figure S18.** Overlay of the GPC curves of non-alternating polyketones which were obtained by varying the catalyst loading (**P4, P6-P8**).

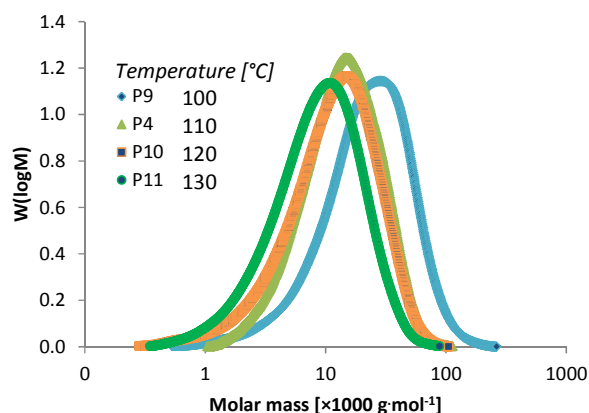

**Figure S19.** Overlay of the GPC curves of non-alternating polyketones which were obtained by varying the temperature (**P4**, **P9**–**P11**).

The phase transitions of polyketones **P1** – **P11** and of reference samples **R1**, **R2** and **PE** were followed by differential scanning calorimetry (DSC). The DSC traces observed for **P4** are shown in Figure S20.

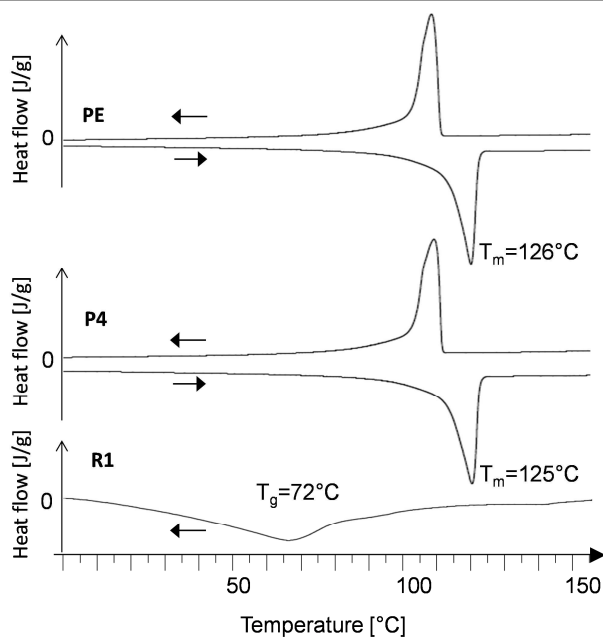

**Figure S20.** DSC traces observed upon heating and cooling of **P4** (middle) in comparison to **PE** (top) and **R1** (bottom) as reference samples.

The melting points of polyketones **P1** – **P11** and of reference samples **R1**, **R2** and **PE** were confirmed by melting the samples on a melting point meter optically following the transparency of the samples (Table S5). Also reported is the crystalline fraction as derived from analysis of the differences between melting and solidification enthalpy.

**Table S5.** Physicochemical and intrinsic properties of polyketones **P1** to **P11** compared to those of reference samples **R1** and **R2**.

| Polyketone | CO content [wt%] | $T_m^a$ [°C] <sup>a</sup> | Crystallinity <sup>b</sup> [%] | Domain size <sup>c</sup> [nm] |
|------------|------------------|---------------------------|--------------------------------|-------------------------------|
| <b>R1</b>  | 50.0             | >220                      | -                              | 11.5 (4.2)                    |
| <b>P1</b>  | 28.9             | >220                      | -                              | 9.5 (2.8)                     |
| <b>P2</b>  | 16.1             | >220                      | 8.5                            | 17.9 (9.0)                    |
| <b>P3</b>  | 3.7              | ≈220                      | 7.4                            | 27.2 (2.2)                    |
| <b>P4</b>  | 2.5              | 127.1                     | 17                             | 20.3 (5.5)                    |
| <b>P5</b>  | 1.5              | 125.9                     | 20                             | 19.0 (4.4)                    |
| <b>P6</b>  | 2.4              | 125.7                     | 47                             | 19.1 (5.4)                    |
| <b>P7</b>  | 5.5              | 123.3                     | 22                             | 19.0 (3.7)                    |
| <b>P8</b>  | 13.5             | 125.1                     | 17                             | 14.2 (5.3)                    |
| <b>P9</b>  | 2.4              | 126.9                     | 18                             | 17.7 (6.7)                    |
| <b>P10</b> | 3.0              | 121.2                     | 17                             | 18.1 (6.7)                    |
| <b>P11</b> | 2.4              | 122.0                     | 12                             | 19.8 (5.6)                    |
| <b>R2</b>  | 0.7              | 128.6                     | 2                              | 16.2 (4.5)                    |
| <b>PE</b>  | ---              | 128.3                     | 13                             | 27.8 (5.8)                    |

<sup>a</sup> Determined on melting point meter; <sup>b</sup> Determined by calorimetry; <sup>c</sup> From analysis of the peak width in powder XRD powder pattern.

When polyketones without alternating segments (**P4**–**P7**, **P9**–**P11**) were heated in a stream of inert gas, the onset temperature of a weight loss ( $T_d$ ) was observed in the range of 464–469°C; decomposition was associated with a weight loss of 93–98% (Table S6).

**Table S6.** Onset temperature  $T_d$  of thermal degradation of polyketones **P1**–**P11** in comparison to reference samples **R1**, **R2** and **PE**.

| Polyketone | $T_d$ [°C]    | Weight loss [%] | $T_d$ [°C]     | Weight loss [%] |
|------------|---------------|-----------------|----------------|-----------------|
|            | <i>Step 1</i> | <i>Step 1</i>   | <i>Step 2</i>  | <i>Step 2</i>   |
| <b>R1</b>  | 339.1         | 58.0            | - <sup>a</sup> | -               |
| <b>P1</b>  | 244.9         | 13.2            | 395.4          | 53.9            |
| <b>P2</b>  | 233.0         | 8.1             | 430.8          | 74.8            |
| <b>P3*</b> | 223.4         | 3.5             | 450.6          | 83.3            |
| <b>P4</b>  | -             | -               | 468.7          | 95.6            |
| <b>P5</b>  | -             | -               | 464.0          | 96.9            |
| <b>P6</b>  | -             | -               | 468.0          | 95.3            |
| <b>P7</b>  | -             | -               | 466.9          | 93.1            |
| <b>P8</b>  | 215.8         | 3.1             | 451.7          | 87.5            |
| <b>P9</b>  | -             | -               | 464.8          | 96.4            |
| <b>P10</b> | -             | -               | 469.1          | 95.1            |
| <b>P11</b> | -             | -               | 466.7          | 96.1            |
| <b>R2</b>  | -             | -               | 463.6          | 98.0            |
| <b>PE</b>  | -             | -               | 468.0          | 99.6            |

<sup>a</sup> No further weight loss until 600°C.

The powder XRD diffractograms of the polyketones are given in Figure S21. **P4** gave rise to a strong reflection at 23.88° and a series of weaker reflections at 29.99, 36.24, 39.77, 40.67, 41.64, 42.91, 43.90, 46.84, 52.91 and 54.84°. All other samples (**P5** to **R2**) exhibited the same set of signals as **P4** but varied in intensity. Comparison with the powder diffractogram of **PE** showed that these reflections are characteristic for domains of polycrystalline polyethylene. Analysing the half width of the most relevant reflections, an average domain size of 18.2(3.7) nm was estimated (Table S5).

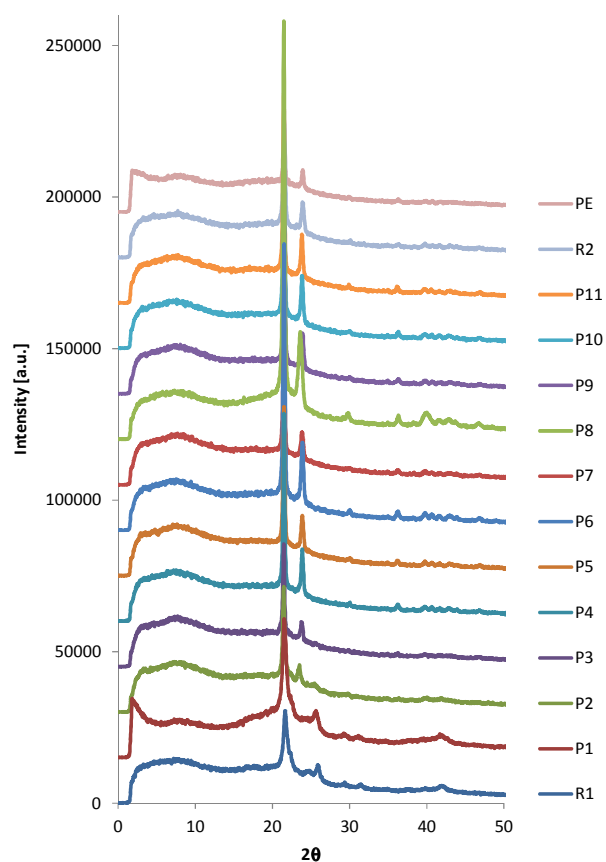

**Figure S21.** Diffraction patterns of polyketones **P1** – **P11** compared to those of polyketone **R1** with alternating CO-C<sub>2</sub>H<sub>4</sub> segments, reference material **R2** with very low CO content and polyethylene **PE**.

## References

1. R. Luo, D. K. Newsham and A. Sen, *Organometallics*, 2009, **28**, 6994-7000.
